# Supplementary material for: Greenland Ice Mapping Project: Ice Flow Velocity Variation at submonthlyto decadal time scales
Source: Copernicus journal article supplement (doi:10.5194/tc-2018-40), 2018-02-27
Supplement: Supplementary file 1 [file tc-2018-40-supplement.pdf]

**Supplement to**  
**Greenland Ice Mapping Project: Ice Flow Velocity Variation at sub-**  
**monthly to decadal time scales**

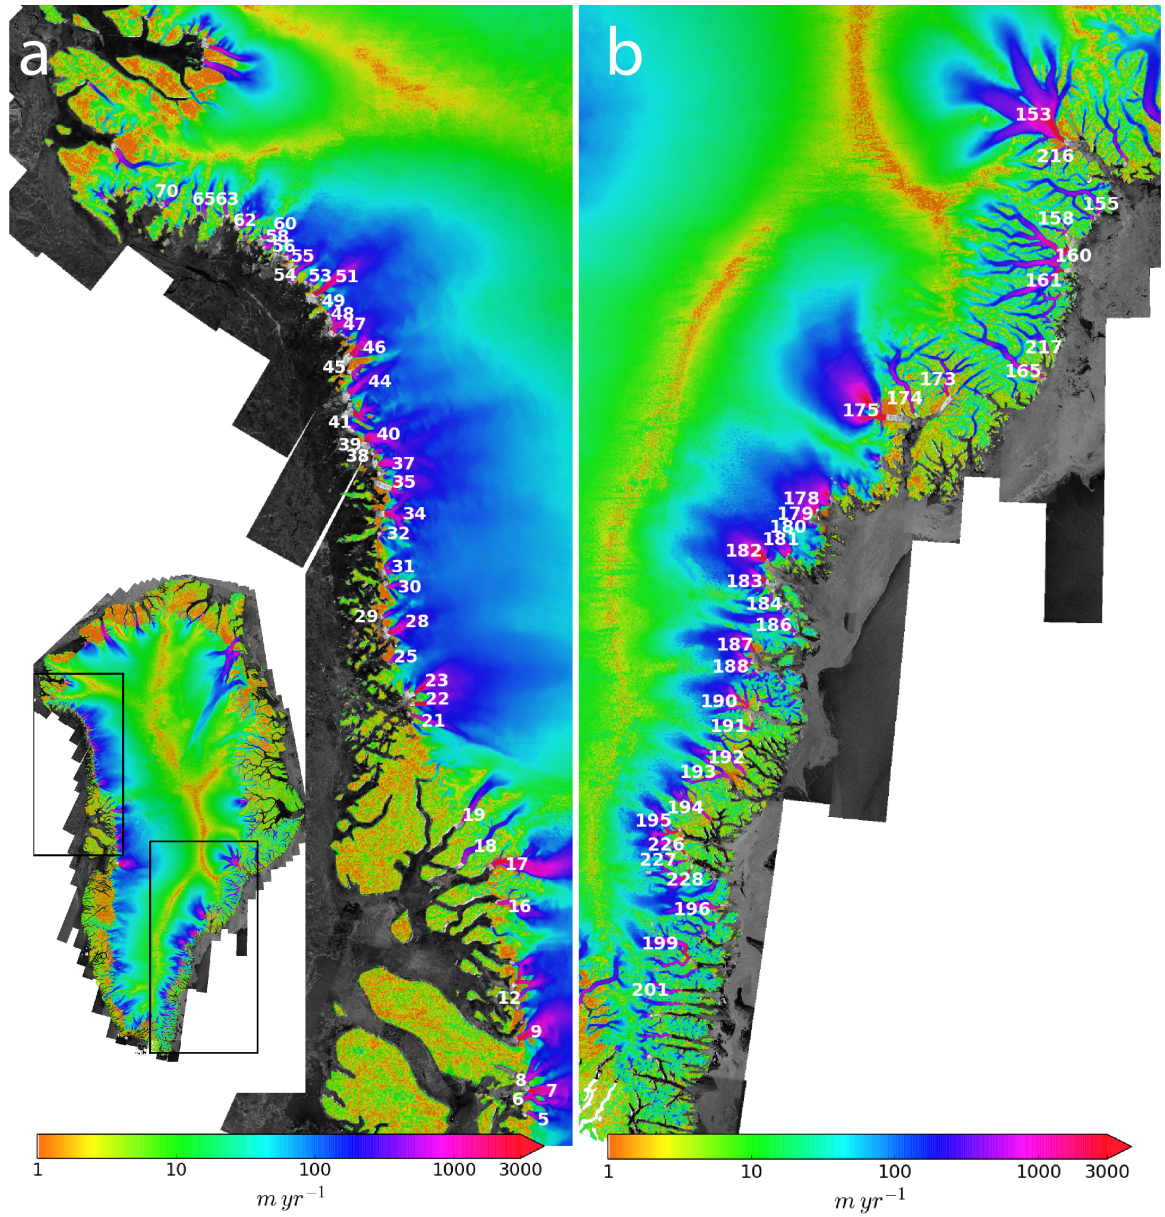

Figure S1. Glacier IDs used for terminus positions distributed through the Greenland Ice Mapping Project (Moon, Joughin, Joughin, & Black, 2015). The numbers shown here correspond to the IDs used in Figure 7.

Moon, T., Joughin, I., Joughin, J., & Black, T. E. (2015). MEaSURES Annual Greenland Outlet Glacier Terminus Positions from SAR Mosaics, Version 1.

<http://doi.org/http://dx.doi.org/10.5067/DC0MLBOCL3EL>
